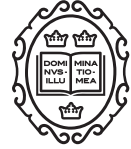

---

## Cohort Profile

# Cohort Profile: The Swedish Women's Lifestyle and Health cohort

Nina Roswall,<sup>1,2</sup> Sven Sandin,<sup>2</sup> Hans-Olov Adami<sup>2,3</sup> and Elisabeth Weiderpass<sup>2,4,5,6\*</sup>

<sup>1</sup>Danish Cancer Society Research Center, Copenhagen, Denmark, <sup>2</sup>Department of Medical Epidemiology and Biostatistics, Karolinska Institutet, Stockholm, Sweden, <sup>3</sup>Department of Epidemiology, Harvard School of Public Health, Boston, MA, USA, <sup>4</sup>Department of Research, Cancer Registry of Norway, Oslo, Norway, <sup>5</sup>Department of Community Medicine, Faculty of Health Sciences, University of Tromsø, The Arctic University of Norway, Tromsø, Norway and <sup>6</sup>Genetic Epidemiology Group, Folkhälsan Research Center, Helsinki, Finland

\*Corresponding author. Department of Medical Epidemiology and Biostatistics, Karolinska Institutet, PO Box 281, SE-171 77 Stockholm, Sweden. E-mail: Elisabeth.Weiderpass.Vainio@ki.se

---

## Why was the cohort set up?

In the early 1980s, a case-control study carried out in the USA found a strong association between oral contraceptive use and breast cancer risk among young women (<37 years at diagnosis), inducing fear of the public health consequences of oral contraceptives.<sup>1</sup> These findings needed to be reproduced in other populations; thus a Swedish/Norwegian research group set up a nationwide case-control study of oral contraceptive use and breast cancer in young women, which confirmed the elevated risk.<sup>2</sup> However, the results of these studies were debated, and several sources of bias in the case-control design were pointed out.<sup>3–5</sup> Based on this criticism, it was decided to set up a large cohort study which would eliminate biases that may occur in the case-control design.

This led to the initiation of the Swedish Women's Lifestyle and Health (WLH) cohort in 1991. The study is carried out in strict coordination with a similar study in Norway—the Norwegian Women and Cancer Study (NOWAC) which includes approximately 60 000 young women. A cohort profile of this study has previously been published.<sup>6</sup>

The purpose of the WLH study was to create a large prospective cohort designed specifically to investigate the association between lifestyle factors (specifically exogenous hormones and dietary habits) and cancer and

cardiovascular disease in young women. Other outcomes have also been investigated, including overall mortality and psychiatric conditions.

The WLH study was co-funded by the Swedish Medical Products Agency, the Swedish Cancer Society and three pharmaceutical companies. The ongoing analyses and the follow-up questionnaire were funded by the Swedish Cancer Society and the Swedish Research Council.

## Who is in the cohort?

Between 1991 and 1992, women were invited to participate in the WLH study. Inclusion criteria were age between 29 and 49 years (born between 1943 and 1962) and residence in the Uppsala Health Care Region, which comprises approximately one-sixth of the Swedish population. Altogether, 96 000 women were randomly selected from the Swedish Population Registry at Statistics Sweden based on their unique, 10-digit national registration number, which includes information on both date of birth and sex.<sup>7</sup> The responsible data monitoring board and the ethical committee in Sweden approved the study design, and all women gave informed consent to participate in the study. The women were mailed an invitation to the study, along with the baseline questionnaire, which included a food

**Table 1.** Baseline characteristics of participants in the Women's Lifestyle and Health cohort, entire cohort and according to follow-up status. Median and 10–90 percentiles, unless otherwise stated

|                               | Baseline cohort<br>N = 49 259 | Responders to the<br>follow-up questionnaire<br>N = 34 402 | Non-responders to<br>the follow-up questionnaire<br>N = 14 857 |
|-------------------------------|-------------------------------|------------------------------------------------------------|----------------------------------------------------------------|
| Age at enrolment, years       | 40 (32–48)                    | 40 (32–48)                                                 | 40 (32–48)                                                     |
| BMI, kg/m <sup>2</sup>        | 23 (20–28)                    | 22.5 (20–28)                                               | 23 (20–28.5)                                                   |
| Missing, N (%)                | 2024 (4.11%)                  | 1213 (3.53%)                                               | 811 (5.46%)                                                    |
| Smoking status, N (%)         |                               |                                                            |                                                                |
| Never                         | 20 476 (41.57%)               | 14 682 (42.68%)                                            | 5794 (39.00%)                                                  |
| Former                        | 18 287 (37.12%)               | 12 821 (37.27%)                                            | 5466 (36.79%)                                                  |
| Current                       | 10 496 (21.31%)               | 6899 (20.05%)                                              | 3597 (24.21%)                                                  |
| Education, N (%)              |                               |                                                            |                                                                |
| 0–10 years                    | 14 491 (30.08%)               | 9160 (27.16%)                                              | 5331 (35.88%)                                                  |
| 11–13 years                   | 18 797 (39.02%)               | 13 334 (39.53%)                                            | 5463 (36.77%)                                                  |
| >13 years                     | 14 880 (30.89%)               | 11 236 (33.31%)                                            | 3644 (24.53%)                                                  |
| Missing                       | 1091 (2.21%)                  | 672 (1.95%)                                                | 419 (2.82%)                                                    |
| Postmenopausal status, N (%)  |                               |                                                            |                                                                |
| Premenopausal                 | 43 112 (87.52%)               | 30 372 (88.29%)                                            | 12 740 (85.75%)                                                |
| Postmenopausal                | 4612 (9.37%)                  | 3091 (8.98%)                                               | 1523 (10.25%)                                                  |
| Missing                       | 1533 (3.11%)                  | 939 (2.73%)                                                | 594 (4.00%)                                                    |
| Oral contraceptive use, N (%) |                               |                                                            |                                                                |
| Never                         | 8089 (16.42%)                 | 5439 (15.81%)                                              | 2650 (17.84%)                                                  |
| Former                        | 34 529 (70.10%)               | 24 355 (70.80%)                                            | 10 174 (68.48%)                                                |
| Current                       | 6246 (12.68%)                 | 4402 (12.80%)                                              | 1844 (12.41%)                                                  |
| Missing                       | 395 (0.80%)                   | 206 (0.60%)                                                | 189 (1.27%)                                                    |
| Parity, N children            | 2 (0–3)                       | 2 (0–3)                                                    | 2 (0–3)                                                        |
| Missing, N (%)                | 7044 (14.30%)                 | 4676 (13.59%)                                              | 2368 (15.94%)                                                  |
| Physical activity, N (%)      |                               |                                                            |                                                                |
| 1 (very low)                  | 2079 (4.22%)                  | 1250 (3.63%)                                               | 829 (5.58%)                                                    |
| 2 (low)                       | 4992 (10.13%)                 | 3544 (10.30%)                                              | 1448 (9.75%)                                                   |
| 3 (moderate)                  | 28 007 (56.86%)               | 19 320 (56.16%)                                            | 8687 (58.47%)                                                  |
| 4 (high)                      | 7895 (16.03%)                 | 5874 (17.07%)                                              | 2021 (13.60%)                                                  |
| 5 (very high)                 | 3950 (8.02%)                  | 2940 (8.55%)                                               | 1010 (6.8%)                                                    |
| Missing                       | 2336 (4.74%)                  | 1474 (4.28%)                                               | 862 (5.80%)                                                    |
| Total energy intake, KJ/day   | 6371.649 (4108.83–9156.69)    | 6420.867 (4211.52–9159.79)                                 | 6245.77 (3863.3–9147.12)                                       |
| Missing, N (%)                | 125 (0.25%)                   | 49 (0.14%)                                                 | 76 (0.51%)                                                     |
| Alcohol intake, g/day         | 2.27 (0–8.38)                 | 2.41 (0–8.48)                                              | 1.97 (0–8.07)                                                  |
| Missing, N (%)                | 6348 (12.89%)                 | 4043 (11.75%)                                              | 2305 (15.51%)                                                  |

frequency questionnaire. In total, 49 259 women (51%) completed and returned the baseline questionnaire, and were thus included in the final cohort.

The baseline characteristics of the participants are shown in Table 1. The median age at enrolment was 40 years, meaning that most women were premenopausal at the time of enrolment. The cohort is generally well-educated, with 68% having completed more than 10 years of schooling, and they also led a generally healthy lifestyle. The median BMI at baseline was 23, only 21% were smokers and only 4% fell into the lowest category of physical activity. Alcohol intake in the cohort was also quite low at baseline, with a median intake of 2.27 g/day. Finally, 13% of the women used oral contraceptives.

### How often have they been followed up?

The participants in the WLH cohort completed a baseline questionnaire in 1991–92. A follow-up questionnaire was sent in 2003 to all women still alive and residing in Sweden at that time. The response rate for the follow-up questionnaire was 73% (Figure 1).

The baseline characteristics of the entire cohort, as well as of responders and non-responders to the follow-up questionnaire, are presented in Table 1. A selection of healthy individuals into cohort studies is often reported, but in the WLH study it seems that this healthy volunteer bias persisted in the follow-up cohort. Indeed, non-responders were more likely to smoke at baseline, to have a shorter education and to be less physically active. In contrast, they

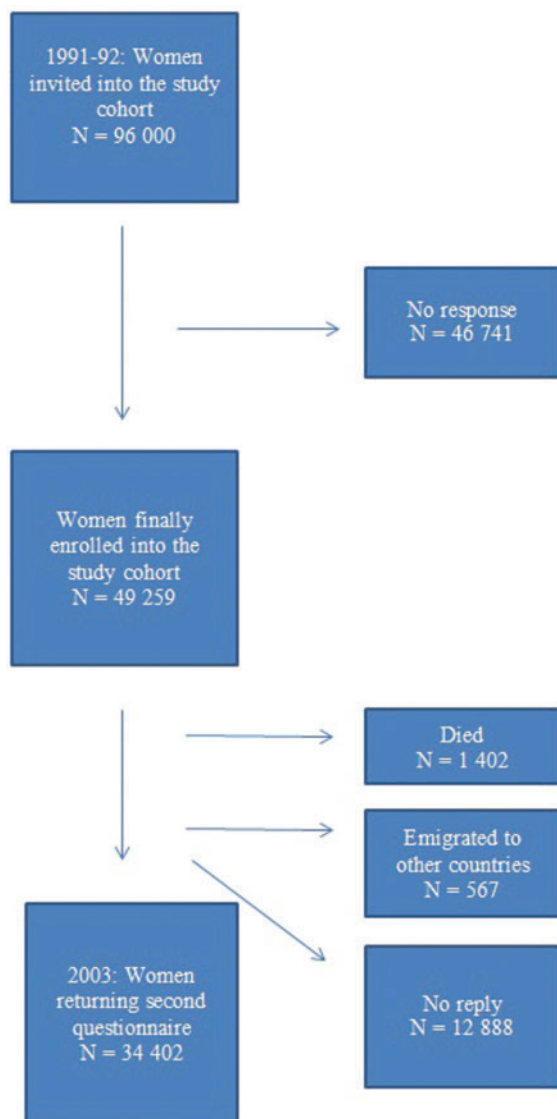

**Figure 1.** Flowchart of participants invited and finally included in the WLH-study.

generally reported a lower alcohol intake at baseline. Non-responders to the follow-up questionnaire were also more likely to have missing information on demographics and lifestyle in the baseline questionnaire. However, it should be noted that the difference between responders and non-responders at follow-up might be partly explained by the fact that non-responders included those who had died between baseline and follow-up, which may introduce some degree of bias towards an unhealthy lifestyle.

Beside the questionnaires, all participants are continuously monitored through linkage to Swedish registries on death, inpatient care and emigration. This is made possible through the unique Swedish national registration number, which is assigned to all Swedish citizens and allows linkage between registries and between cohort data and registries.

At present, no new follow-up questionnaire is planned, but the women are continuously followed up through linkage to registries.

## What has been measured?

### Questionnaire data

Baseline questionnaires were mailed in two rounds: one in 1991 and one in 1992. The baseline questionnaire included a detailed assessment of hormonal and reproductive factors, including menstrual history, use of hormone replacement therapy, pregnancies and breastfeeding, oral contraceptive use, disease history (both the woman's own history and family history of diseases), anthropometric measures, occupational history, emotional support, lifestyle factors (e.g. smoking and physical activity), skin and hair colour, sun/ultraviolet light exposure and sensitivity and an 80-item food frequency questionnaire. To facilitate recall of oral contraceptive use, a colour brochure with pictures of almost all contraceptive pill packages ever sold in Sweden was included.

In 2003, all participants still living in Sweden were sent a second questionnaire to update the assessment of lifestyle habits. Furthermore, we added questions on topics that had not been assessed in the baseline questionnaire, such as attitudes and feelings, sleeping habits and infertility treatment. A comparison of the topics covered in the baseline and follow-up questionnaires can be found in Table 2. Participants could complete the follow-up questionnaire on paper and return it by mail, or they could complete it as a web-based questionnaire, but the contents of the two questionnaires were the same.

The baseline and follow-up questionnaires are available in an English translation on the study webpage [[http://www.meb.ki.se/~eliwei\\_2011/wlh/wlh\\_documents/](http://www.meb.ki.se/~eliwei_2011/wlh/wlh_documents/)] and from the principal investigator, upon request.

### Registry data

Virtually complete follow-up has been achieved through linkage to a broad range of national, well-validated registries. Statistics Sweden collects the date of death or emigration for all Swedes.<sup>8</sup> The Cause of Death Registry contains information on the underlying and contributory causes of death, recorded using International Classification of Diseases (ICD) codes, for all Swedes from 1961 onwards.<sup>9</sup>

The vital status of WLH participants is described in Table 3. The Swedish Cancer Registry contains information on all cancers diagnosed in Sweden since 1958, including cancer type (by ICD code), date of diagnosis, histology,

**Table 2.** Variables included in the baseline and follow-up questionnaire in the WLH cohort

| Topic                                                                                 | Baseline questionnaire | Follow-up questionnaire |
|---------------------------------------------------------------------------------------|------------------------|-------------------------|
| Country of origin                                                                     | X                      |                         |
| Education                                                                             | X                      | X                       |
| Mother's age at birth                                                                 | X                      |                         |
| Siblings                                                                              | X                      |                         |
| Menstrual history                                                                     | X                      | X                       |
| Menopausal status                                                                     | X                      | X                       |
| Use of hormone replacement therapy                                                    | X                      | X                       |
| Pregnancies, deliveries and breastfeeding                                             | X                      | X                       |
| Infertility                                                                           |                        | X                       |
| Oral contraceptive use                                                                | X                      | X                       |
| Other contraceptive use                                                               | X                      | X                       |
| Disease history                                                                       | X                      | X                       |
| Self-assessed health status                                                           | X                      |                         |
| Anthropometric measures                                                               | X                      | X                       |
| Weight change during adult life                                                       |                        | X                       |
| Smoking habits                                                                        | X                      | X                       |
| Physical activity                                                                     | X                      | X                       |
| Personal description, i.e. colour of skin, hair and eyes                              | X                      |                         |
| Birthmarks                                                                            | X                      | X                       |
| Sun habits, including use of sun lotion, solarium, beach holidays, sunburn, by decade | X                      | X                       |
| Food frequency questionnaire                                                          | X                      |                         |
| Alcohol use                                                                           | X                      | X                       |
| Occupational environment                                                              | X                      | X                       |
| Private life                                                                          | X                      |                         |
| Health examinations and health care                                                   |                        | X                       |
| Sleep                                                                                 |                        | X                       |
| Attitudes and feelings                                                                |                        | X                       |

pathology, morphology and the coding of tumour.<sup>10</sup> The Swedish Cancer Registry has been validated, showing a high level of completeness.<sup>11</sup> The Swedish Inpatient Registry is a discharge registry; it contains information on all inpatient procedures that require hospital admission, including the main and up to eight secondary diagnoses, and date of discharge. It has nationwide coverage from 1987 onwards.<sup>12</sup> From 2001, the register also contains data on outpatient visits, including day surgery, as well as psychiatry from private and public providers.<sup>12</sup> The validity of the National Patient Registry is generally regarded as high, with a positive predictive value of 85–95% for different diagnoses.<sup>13</sup> Since 2005, a Swedish Prescribed Drug Registry, containing data on all prescribed drugs administered in Sweden,<sup>14</sup> has also been available for linkage and has allowed pharmacoepidemiological studies to be carried

**Table 3.** Vital status of participants included in the cohort as of 31 December 2012

| Vital status                                | N (% of original cohort) |
|---------------------------------------------|--------------------------|
| Alive                                       | 46 790                   |
| Dead                                        | 2470                     |
| Main cause of death: cancer                 | 134                      |
| Main cause of death: cardiovascular disease | 28                       |
| Main cause of death: injuries/suicide       | 60                       |
| Main cause of death: other                  | 2248                     |
| Emigrated                                   | 1890                     |

out. The incidence of cancer and cardiovascular disease outcomes in the cohort up to 31 December 2012 are presented in Table 4. Breast cancer, cardiovascular disease in general and the subgroups ischaemic heart disease, hypertensive disease and stroke, have the strongest power for scientific investigation. This is reflected in the studies already published from the WLH cohort, where these are the primary outcomes investigated.

### What has it found? Key messages and publications

More than 50 peer-reviewed scientific papers have been published based on data from the WLH cohort alone, or in combination with data from other cohorts, such as the Norwegian sister-cohort NOWAC, or as part of larger meta-analyses. A complete and continuously updated list of publications emanating from the WLH study can be found on the study webpage [<http://ki.se/en/meb/womens-lifestyle-and-health>]. In this section we will summarize the findings related to the primary exposures the WLH study was designed to investigate.

#### Oral contraceptives

One of the primary exposures investigated in the WLH cohort is oral contraceptive use, which led to the initiation of the study in the first place. A large prospective study was published in 2002, including data from both Swedish and Norwegian women, which confirmed the findings of the original case-control study, i.e. an increased breast cancer risk following oral contraceptive use.<sup>15</sup> Oral contraceptive use has also been examined in the WLH cohort in relation to ovarian cancer,<sup>16</sup> myocardial infarction<sup>17</sup> and stroke.<sup>18</sup> The results showed a significantly lower risk of ovarian tumours among ever users of oral contraceptives, with a trend across duration of use,<sup>16</sup> but no association was

**Table 4.** Incidence of cancer and cardiovascular disease (main diagnosis only) recorded in the cohort up to 31 December 2012; only most common diseases (>100 cases) included

| Disease                                                     | N (% of original cohort) |
|-------------------------------------------------------------|--------------------------|
| <b>Cancers</b>                                              |                          |
| Breast cancer                                               | 1849 (3.8)               |
| Malignant melanoma of skin                                  | 282 (0.6)                |
| Bronchus and trachea, and lung specified as primary         | 258 (0.5)                |
| Corpus uteri                                                | 222 (0.5)                |
| Ovary, fallopian tube and broad ligament                    | 213 (0.4)                |
| Brain and other parts of nervous system                     | 191 (0.4)                |
| Large intestine, except rectum                              | 188 (0.4)                |
| Rectum                                                      | 122 (0.3)                |
| Other and unspecified sites                                 | 113 (0.2)                |
| Other endocrine glands                                      | 108 (0.2)                |
| <b>Cardiovascular disease</b>                               |                          |
| All cardiovascular disease                                  | 8364 (17.0)              |
| Diseases of veins, lymphatic vessels and lymph nodes        | 3349 (6.8)               |
| Other forms of heart diseases                               | 1542 (3.1)               |
| Ischaemic heart diseases                                    | 1054 (2.1)               |
| Hypertensive diseases                                       | 1012 (2.1)               |
| Cerebrovascular diseases                                    | 729 (1.5)                |
| Diseases of arteries, arterioles and capillaries            | 367 (0.8)                |
| Pulmonary heart disease / diseases of pulmonary circulation | 186 (0.4)                |

found with the cardiovascular outcomes.<sup>17,18</sup> The study on oral contraceptive use and stroke found no significant association with haemorrhagic or ischaemic stroke when examining use by status (never, former, current oral contraceptive use), duration of use or age at first use (Table 5).

### Dietary factors

Several papers have used WLH data to examine a variety of dietary factors in relation to lifestyle-related diseases. These include a range of dietary patterns,<sup>19–26</sup> acrylamide,<sup>27</sup> phytoestrogens,<sup>28,29</sup> dietary fat,<sup>30</sup> fish,<sup>31</sup> fruits/vegetables<sup>32</sup> and coffee/tea and caffeine<sup>33</sup> consumption. Notably, the study on acrylamide and breast cancer was the first prospective cohort study to examine this association after the Swedish National Food Administration announced the alarming discovery of acrylamide in commonly consumed baked and fried foods.<sup>34</sup> The study in the WLH cohort showed no significantly increased risk across quintiles of

**Table 5.** Relative risk (RR) of fatal or non-fatal stroke, according to oral contraceptive (OC) use. Adapted from reference 18

|                            | N of subjects | Stroke cases | Age-adjusted RR | Multivariate adjusted RR <sup>a</sup> |
|----------------------------|---------------|--------------|-----------------|---------------------------------------|
| <b>Ischaemic stroke</b>    |               |              |                 |                                       |
| OC status                  |               |              |                 |                                       |
| Never users                | 7471          | 44           | 1.0 (Ref.)      | 1.0 (Ref.)                            |
| Former users               | 6794          | 20           | 0.9 (0.5–1.6)   | 1.1 (0.6–2.0)                         |
| Current users              | 31 464        | 129          | 0.9 (0.6–1.2)   | 0.9 (0.6–1.4)                         |
| Duration of OC use         |               |              |                 |                                       |
| <5 years                   | 16 262        | 74           | 0.9 (0.6–1.3)   | 1.0 (0.6–1.5)                         |
| 5–9 years                  | 10 568        | 24           | 0.5 (0.3–0.9)   | 0.6 (0.4–1.2)                         |
| ≥10 years                  | 10 877        | 45           | 1.0 (0.6–1.4)   | 1.2 (0.7–1.9)                         |
| <i>P</i> for trend         |               |              | 0.43            | 0.77                                  |
| Age at first use of OC     |               |              |                 |                                       |
| <20                        | 22 065        | 62           | 0.9 (0.6–1.3)   | 0.9 (0.6–1.5)                         |
| 20–24                      | 11 228        | 59           | 0.9 (0.6–1.3)   | 1.0 (0.6–1.6)                         |
| 25–30                      | 3212          | 17           | 0.8 (0.4–1.3)   | 1.0 (0.5–1.8)                         |
| >30                        | 1445          | 7            | 0.7 (0.3–1.6)   | 1.1 (0.5–2.4)                         |
| <i>P</i> for trend         |               |              | 0.25            | 0.97                                  |
| <b>Haemorrhagic stroke</b> |               |              |                 |                                       |
| OC status                  |               |              |                 |                                       |
| Never users                | 7471          | 10           | 1.0 (Ref.)      | 1.0 (Ref.)                            |
| Former users               | 6794          | 3            | 0.6 (0.2–2.2)   | 0.4 (0.1–2.1)                         |
| Current users              | 31 464        | 59           | 1.7 (0.9–3.3)   | 1.6 (0.8–3.2)                         |
| Duration of OC use         |               |              |                 |                                       |
| <5 years                   | 16 262        | 31           | 1.7 (0.8–3.5)   | 1.4 (0.7–3.0)                         |
| 5–9 years                  | 10 568        | 14           | 1.4 (0.6–3.2)   | 1.5 (0.7–3.6)                         |
| ≥10 years                  | 10 877        | 17           | 1.6 (0.7–3.5)   | 1.6 (0.7–3.6)                         |
| <i>P</i> for trend         |               |              | 0.44            | 0.30                                  |
| Age at first use of OC     |               |              |                 |                                       |
| <20                        | 22 065        | 30           | 2.0 (0.9–4.2)   | 2.0 (0.9–4.4)                         |
| 20–24                      | 11 228        | 19           | 1.2 (0.6–2.6)   | 1.1 (0.5–2.4)                         |
| 25–30                      | 3212          | 5            | 1.0 (0.3–2.9)   | 0.9 (0.3–2.9)                         |
| >30                        | 1445          | 6            | 2.7 (1.0–7.5)   | 2.3 (0.8–6.8)                         |
| <i>P</i> for trend         |               |              | 0.28            | 0.46                                  |

<sup>a</sup>Adjusted for BMI, education, alcohol, smoking status, pack-years, physical activity, high blood pressure and diabetes

acrylamide intake and no association with specific foods identified as a source of acrylamide, such as fried potatoes, coffee or crisp bread<sup>27</sup> (Figure 2).

### Sun / ultraviolet light exposure

The WHL study has detailed information on sun and ultraviolet light exposure and sensitivity. This has resulted in a number of papers, primarily on malignant melanoma,<sup>35,36</sup> squamous cell skin cancer<sup>37</sup> and atypical nevi,<sup>38,39</sup> showing a higher risk of both cancer types, especially with cumulative sun / ultraviolet light exposure. Furthermore, women with red hair colour, many nevi and high sun sensitivity experienced a further

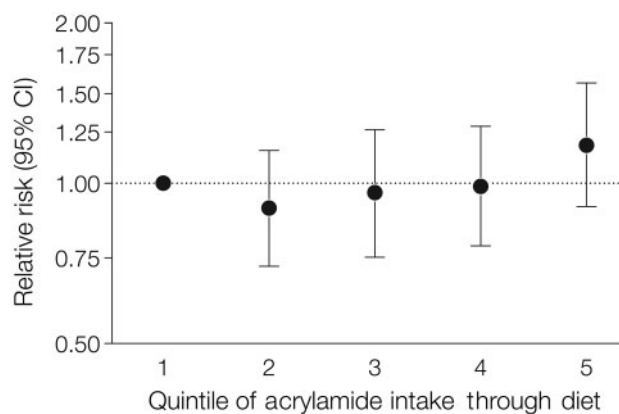

**Figure 2.** Quintiles of acrylamide intake throughout diet. Adapted from reference 27.

increased risk.<sup>35–37</sup> In contrast, the studies found no association between sun / ultraviolet light exposure and breast cancer,<sup>40</sup> non-Hodgkin lymphoma<sup>41</sup> or overall cancer.<sup>42</sup> However, sun exposure was associated with lower overall mortality, whereas exposure to artificial ultraviolet light was associated with higher overall mortality.<sup>43</sup>

Other notable exposures investigated in the WLH cohort include anthropometric measures in relation to breast cancer,<sup>44,45</sup> and overall mortality,<sup>46</sup> cardiovascular disease,<sup>47,48</sup> smoking<sup>49–52</sup> and physical activity<sup>53–55</sup> in relation to cancer / cardiovascular disease.

A summary of the most important findings with a specific focus on outcomes would entail a repetition of several of the above-mentioned findings. It should be mentioned, though, that the primary outcomes to which the WLH study has contributed epidemiological evidence include breast cancer, cardiovascular disease and overall mortality, as these are the outcomes with the highest incidence in the cohort and thus the largest statistical power to investigate epidemiological associations (Table 3). Other notable outcomes explored in the WLH cohort include other cancer types, primarily endometrial, ovarian<sup>16,33,45,50,55</sup> and skin cancer.<sup>35–37</sup>

## What are the main strengths and weaknesses?

### Strengths

The WLH cohort is a population-based, prospective cohort study with virtually complete follow-up of all participants. The large sample size provides the statistical power to investigate a range of outcomes. The relatively young age of the women at baseline meant that it took longer for the study to reach statistical power for a range of outcomes.

On the other hand, it enabled the investigation of a range of epidemiological associations in younger women that had previously been investigated primarily in middle-aged women. This enabled investigators to see if previously acknowledged associations were visible already in relatively young women, and entailed an intriguing new possibility for investigations, particularly for hormone-related exposures. The follow-up data add a temporal aspect to the exposure to hormonal factors, which may have changed over the course of follow-up due to things such as childbirth, breastfeeding, oral contraceptive use and menopausal status (see Table 2).

The long follow-up period that has passed since the collection of both baseline and follow-up data means that the number of cases has been growing, and with it the statistical power for a range of outcomes. A main strength of the cohort is that follow-up of the women is based on the unique national registration number, allowing linkage to a broad range of validated Swedish registries that include information on things such as cause and date of death, hospital discharge and drug use. Reporting is mandatory for several of these registries and, as mentioned previously, the validity of Swedish registries has generally been found to be high.<sup>11,13</sup> The continuous follow-up of WLH participants through registries serves as a growing resource for research on the relationship between lifestyle and disease in young to middle-aged women over their lifetime, with a steadily accumulating number of cases.

### Weaknesses

As is often the case with cohort studies, the WLH cohort suffers from potential healthy volunteer bias, as those with a serious illness or disability might be less likely to participate both at baseline and at follow-up. As shown in Table 1, the healthy volunteer bias is stronger in the selection of women who responded to the follow-up questionnaire (Table 1). This may affect the generalizability of findings from the WLH study. All information collected in the questionnaires is self-reported, and anthropometric information is self-measured, leaving room for potential information bias. Validation studies have been conducted on information collected in the food frequency questionnaire,<sup>56</sup> but no validation study has been done on the anthropometric and biological measures, and this should be kept in mind when using these data. As mentioned above, the relatively young age at enrolment entails a low power to investigate a number of outcomes, such as less common cancers and subgroups of cardiovascular disease. However, as the cohort ages and more person-years of follow-up accumulate, these numbers will increase,

allowing for more informative studies in the future. The last follow-up questionnaire was sent in 2003. As more than 10 years have now passed, it is likely that some women will have changed their exposure status. Although a third follow-up exposure assessment would contribute more up-to-date data, no such follow-up is planned at present. However, even though increasing exposure misclassification is a potential problem over an extended follow-up period, the induction time for the primary malignancies of interest in the present cohort (i.e. cancer and cardiovascular disease) is very long, often spanning decades, and the inclusion of women at a young age may have allowed us to capture exposures during the aetiologically relevant time period.

Finally, the Norwegian sister-cohort, NOWAC, has the added benefit of biological material,<sup>6</sup> which is unfortunately not available for the WLH cohort. However, Sweden has unique opportunities to retrieve histopathological material, thus allowing some biological testing, for example detailed phenotypical characterization of tumours.

### Can I get a hold of the data? Where can I find out more?

The data pertaining to the WLH are held at the Department of Medical Epidemiology and Biostatistics, Karolinska Institutet, Stockholm, Sweden.

Potential collaborators can read about the study and existing publications on the study webpage [<http://ki.se/en/meb/womens-lifestyle-and-health>]. As mentioned previously, an English translation of the two questionnaires is also available there. The page also contains contact information for the principal investigators, with whom potential ideas for collaboration should be discussed. In order to access WLH data, an analysis plan must be submitted and approved. Templates for applications to access the data are available upon request from Dr Elisabete Weiderpass [[Elisabete.Weiderpass.Vainio@ki.se](mailto:Elisabete.Weiderpass.Vainio@ki.se)]. All collaborators should be able to cover their own study expenses, as the WLH study relies on ongoing grants that cover only approved/funded projects.

#### Profile in a nutshell

- The Women's Lifestyle and Health cohort is a prospective study, investigating the association between lifestyle (specifically hormonal factors) and, primarily, cancer / cardiovascular disease in young women.
- A total of 49 259 Swedish women aged 29–49 were included at baseline (1991–92).

- Women still living in Sweden in 2003 received a follow-up questionnaire; 73% of the available women (34 402) returned this. Furthermore, participants are followed up through Swedish registries on death, inpatient care and emigration.
- All women filled in a detailed questionnaire on hormonal/reproductive factors, disease history, anthropometry, occupation, lifestyle, personal characteristics, sun / ultra-violet exposure and an 80-item food frequency questionnaire.
- The data are held at the Department of Medical Epidemiology and Biostatistics, Karolinska Institutet, Stockholm, Sweden, and are available to external scientists by application.

### Funding

This work was funded by a grant from the Swedish Research Council [Grant number 521-2011-2955].

### Acknowledgements

We are grateful for the collaboration of the 49 259 women who chose to take part in the Women's Lifestyle and Health cohort. Furthermore, the authors wish to thank data manager Pouran Almstedt for database administration.

**Conflict of interest:** The authors have no conflict of interest to declare.

### References

1. Pike MC, Henderson BE, Krailo MD, Duke A, Roy S. Breast cancer in young women and use of oral contraceptives: possible modifying effect of formulation and age at use. *Lancet* 1983;2:926–30.
2. Meirik O, Lund E, Adami HO, Bergstrom R, Christoffersen T, Bergsjö P. Oral contraceptive use and breast cancer in young women. A joint national case-control study in Sweden and Norway. *Lancet* 1986;2:650–54.
3. Meirik O, Lund E, Adami HO, Bergstrom R, Christoffersen T, Bergsjö P. Oral contraceptives and breast cancer. *Lancet* 1986;2:1272–73.
4. Shapiro S. Bias in the evaluation of low-magnitude associations: an empirical perspective. *Am J Epidemiol* 2000;151:939–45.
5. Skegg DC. Potential for bias in case-control studies of oral contraceptives and breast cancer. *Am J Epidemiol* 1988;127:205–12.
6. Lund E, Dumeaux V, Braaten T *et al.* Cohort profile: The Norwegian Women and Cancer Study—NOWAC—Kvinner og kreft. *Int J Epidemiol* 2008;37:36–41.
7. Lunde AS, Lundeberg S, Lettenstrom GS, Thygesen L, Huebner J. The person-number systems of Sweden, Norway, Denmark, and Israel. Vital and health statistics Series 2, *Data Evaluation and Methods Research* 1980;84:1–59.
8. Centralbyrå S. *Population Statistics 2015*. <http://www.scb.se/en/Finding-statistics/Statistics-by-subject-area/Population/Population-composition/Population-statistics/> (23 May 2015, date last accessed).

9. Socialstyrelsen. *Dödsorsaksregisteret 2015* [The National Board of Health and Welfare. *Cause of Death Registry*]: <http://www.socialstyrelsen.se/register/dodsorsaksregistret> (23 May 2015, date last accessed).
10. Socialstyrelsen. *Swedish Cancer Registry 2015*. <http://www.socialstyrelsen.se/register/halsodataregister/cancerregistret/inenglish> (23 May 2015, date last accessed).
11. Barlow L, Westergren K, Holmberg L, Talback M. The completeness of the Swedish Cancer Register: a sample survey for year 1998. *Acta Oncol* 2009;**48**:27–33.
12. Socialstyrelsen. *Patientregistret 2015* [The National Board of Health and Welfare. *The National Patient Register*.] <http://www.socialstyrelsen.se/register/halsodataregister/patientregistret> (23 May 2015, date last accessed).
13. Ludvigsson JF, Andersson E, Ekblom A *et al.* External review and validation of the Swedish national inpatient register. *BMC Public Health* 2011;**11**:450.
14. Wettermark B, Hammar N, Fored CM *et al.* The new Swedish Prescribed Drug Register – opportunities for pharmacoepidemiological research and experience from the first six months. *Pharmacoepidemiol Drug Saf* 2007;**16**:726–35.
15. Kumle M, Weiderpass E, Braaten T, Persson I, Adami HO, Lund E. Use of oral contraceptives and breast cancer risk: The Norwegian-Swedish Women's Lifestyle and Health Cohort Study. *Cancer Epidemiol Biomarkers Prev* 2002;**11**:1375–81.
16. Kumle M, Weiderpass E, Braaten T, *et al.* Risk for invasive and borderline epithelial ovarian neoplasias following use of hormonal contraceptives: the Norwegian-Swedish Women's Lifestyle and Health Cohort Study. *Br J Cancer* 2004;**90**:91386–91.
17. Margolis KL, Adami HO, Luo J, Ye W, Weiderpass E. A prospective study of oral contraceptive use and risk of myocardial infarction among Swedish women. *Fertil Steril* 2007;**88**:310–16.
18. Yang L, Kuper H, Sandin S *et al.* Reproductive history, oral contraceptive use, and the risk of ischemic and hemorrhagic stroke in a cohort study of middle-aged Swedish women. *Stroke*;2009;**40**:1050–58.
19. Lagiou P, Trichopoulos D, Sandin S *et al.* Mediterranean dietary pattern and mortality among young women: a cohort study in Sweden. *Br J Nutr* 2006;**96**:384–92.
20. Lagiou P, Sandin S, Weiderpass E *et al.* Low carbohydrate-high protein diet and mortality in a cohort of Swedish women. *J Intern Med* 2007;**261**:366–74.
21. Couto E, Sandin S, Lof M, Ursin G, Adami HO, Weiderpass E. Mediterranean dietary pattern and risk of breast cancer. *PLoS One* 2013;**8**:e55374.
22. Lagiou P, Sandin S, Lof M, Trichopoulos D, Adami HO, Weiderpass E. Low carbohydrate-high protein diet and incidence of cardiovascular diseases in Swedish women: prospective cohort study. *BMJ* 2012;**344**:e4026.
23. Roswall N, Sandin S, Löf M *et al.* Adherence to the healthy Nordic food index and total and cause-specific mortality among Swedish women – a cohort study. *Eur J Epidemiol* 2015. doi: 10.1007/s10654-015-0021-x.
24. Roswall N, Eriksson U, Sandin S *et al.* Adherence to the healthy Nordic Food Index, dietary composition and lifestyle among Swedish women. *Food Nutr Res* 2015, Mar 11. doi: 10.3402/fnr.v59.26336.
25. Roswall N, Li Y, Kyro C *et al.* No association between adherence to a healthy nordic food index and colorectal cancer: Results from a Swedish Cohort Study. *Cancer Epidemiol Biomarkers Prev* 2015;**24**:755–57.
26. Li Y, Roswall N, Sandin S, Strom P, Adami HO, Weiderpass E. Adherence to a healthy Nordic food index and breast cancer risk: results from a Swedish cohort study. *Cancer Causes Control* 2015, Mar 18. PMID: 25783459. [Epub ahead of print.]
27. Mucci LA, Sandin S, Balter K, Adami HO, Magnusson C, Weiderpass E. Acrylamide intake and breast cancer risk in Swedish women. *JAMA* 2005;**293**:1326–27.
28. Hedelin M, Lof M, Olsson M, Adlercreutz H, Sandin S, Weiderpass E. Dietary phytoestrogens are not associated with risk of overall breast cancer but diets rich in coumestrol are inversely associated with risk of estrogen receptor and progesterone receptor negative breast tumors in Swedish women. *J Nutr* 2008;**138**:938–45.
29. Hedelin M, Lof M, Andersson TM, Adlercreutz H, Weiderpass E. Dietary phytoestrogens and the risk of ovarian cancer in the women's lifestyle and health cohort study. *Cancer Epidemiol Biomarkers Prev* 2011;**20**:308–17.
30. Lof M, Sandin S, Lagiou P *et al.* Dietary fat and breast cancer risk in the Swedish women's lifestyle and health cohort. *Br J Cancer* 2007;**97**:1570–76.
31. Hedelin M, Lof M, Olsson M *et al.* Dietary intake of fish, omega-3, omega-6 polyunsaturated fatty acids and vitamin D and the prevalence of psychotic-like symptoms in a cohort of 33 000 women from the general population. *BMC Psychiatry* 2010;**10**:38.
32. Lof M, Sandin S, Lagiou P, Trichopoulos D, Adami HO, Weiderpass E. Fruit and vegetable intake and risk of cancer in the Swedish women's lifestyle and health cohort. *Cancer Causes Control* 2011;**22**:283–89.
33. Weiderpass E, Sandin S, Lof M *et al.* Endometrial cancer in relation to coffee, tea, and caffeine consumption: a prospective cohort study among middle-aged women in Sweden. *Nutr Cancer* 2014;**66**:1132–43.
34. Administration SNF. *Acrylamide in Summary 2013*. <http://www.livsmedelsverket.se/en/food-and-content/oonskade-amnen/akrylamid/> (23 May 2015, date last accessed).
35. Veierod MB, Weiderpass E, Thorn M *et al.* A prospective study of pigmentation, sun exposure, and risk of cutaneous malignant melanoma in women. *J Natl Cancer Inst* 2003;**95**:1530–38.
36. Veierod MB, Adami HO, Lund E, Armstrong BK, Weiderpass E. Sun and solarium exposure and melanoma risk: effects of age, pigmentary characteristics, and nevi. *Cancer Epidemiol Biomarkers Prev* 2010;**19**:111–20.
37. Veierod MB, Couto E, Lund E, Adami HO, Weiderpass E. Host characteristics, sun exposure, indoor tanning and risk of squamous cell carcinoma of the skin. *Int J Cancer* 2014;**135**: 413–22.
38. Titus-Ernstoff L, Mansson-Brahme E, Thorn M *et al.* Factors associated with atypical nevi: a population-based study. *Cancer Epidemiol Biomarkers Prev* 1998;**7**:207–10.
39. Titus-Ernstoff L, Thorn M, Tosteson TD *et al.* The accuracy of skin self-examination for atypical nevi. *Epidemiology* 1996;**7**: 619–23.
40. Kuper H, Yang L, Sandin S, Lof M, Adami HO, Weiderpass E. Prospective study of solar exposure, dietary vitamin D intake,



- and risk of breast cancer among middle-aged women. *Cancer Epidemiol Biomarkers Prev* 2009;**18**:2558–61.
41. Veierod MB, Smedby KE, Lund E, Adami HO, Weiderpass E. Pigmentary characteristics, UV radiation exposure, and risk of non-Hodgkin lymphoma: a prospective study among Scandinavian women. *Cancer Epidemiol Biomarkers Prev* 2010;**19**:1569–76.
  42. Yang L, Veierod MB, Lof M, Sandin S, Adami HO, Weiderpass E. Prospective study of UV exposure and cancer incidence among Swedish women. *Cancer Epidemiol Biomarkers Prev* 2011;**20**:1358–67.
  43. Yang L, Lof M, Veierod MB, Sandin S, Adami HO, Weiderpass E. Ultraviolet exposure and mortality among women in Sweden. *Cancer Epidemiol Biomarkers Prev* 2011;**20**:683–90.
  44. Weiderpass E, Braaten T, Magnusson C *et al.* A prospective study of body size in different periods of life and risk of premenopausal breast cancer. *Cancer Epidemiol Biomarkers Prev* 2004;**13**:1121–27.
  45. Lof M, Sandin S, Hilakivi-Clarke L, Weiderpass E. Birth weight in relation to endometrial and breast cancer risks in Swedish women. *Br J Cancer* 2007;**96**:134–36.
  46. Hjartaker A, Adami HO, Lund E, Weiderpass E. Body mass index and mortality in a prospectively studied cohort of Scandinavian women: the women's lifestyle and health cohort study. *Eur J Epidemiol* 2005;**20**:747–54.
  47. Lu M, Ye W, Adami HO, Weiderpass E. Prospective study of body size and risk for stroke amongst women below age 60. *J Intern Med* 2006;**260**:442–50.
  48. Yang L, Kuper H, Weiderpass E. Anthropometric characteristics as predictors of coronary heart disease in women. *J Intern Med* 2008;**264**:39–49.
  49. Gram IT, Braaten T, Terry PD *et al.* Breast cancer risk among women who start smoking as teenagers. *Cancer Epidemiol Biomarkers Prev* 2005;**14**:61–66.
  50. Gram IT, Braaten T, Adami HO, Lund E, Weiderpass E. Cigarette smoking and risk of borderline and invasive epithelial ovarian cancer. *Int J Cancer* 2008;**122**:647–52.
  51. Gram IT, Sandin S, Braaten T, Lund E, Weiderpass E. The hazards of death by smoking in middle-aged women. *Eur J Epidemiol* 2013;**28**:799–806.
  52. Lu M, Ye W, Adami HO, Weiderpass E. Stroke incidence in women under 60 years of age related to alcohol intake and smoking habit. *Cerebrovasc Dis* 2008;**25**:517–25.
  53. Margolis KL, Mucci L, Braaten T *et al.* Physical activity in different periods of life and the risk of breast cancer: the Norwegian-Swedish Women's Lifestyle and Health cohort study. *Cancer Epidemiol Biomarkers Prev* 2005;**14**:27–32.
  54. Trolle-Lagerros Y, Mucci LA, Kumle M *et al.* Physical activity as a determinant of mortality in women. *Epidemiology* 2005;**16**:780–85.
  55. Weiderpass E, Margolis KL, Sandin S *et al.* Prospective study of physical activity in different periods of life and the risk of ovarian cancer. *Int J Cancer* 2006;**118**:3153–60.
  56. Khani BR, Ye W, Terry P, Wolk A. Reproducibility and validity of major dietary patterns among Swedish women assessed with a food-frequency questionnaire. *J Nutr* 2004;**134**:1541–45.
